# Supplementary material for: Bipolar I and II Disorders; A Systematic Review and Meta-Analysis on Differences in Comorbid Obsessive-Compulsive Disorder
Source: PubMed Central journal article supplement — Iran J Psychiatry Behav Sci. 2016 Aug 17;10(3):e3604. doi: 10.17795/ijpbs-3604 (PMC5098723; doi:10.17795/ijpbs-3604), 2016-08-17
Supplement: ijpbs-10-03-3604-s001.pdf [file ijpbs-10-03-3604-s001.pdf]

Appendix 1. MEDLINE search strategy

| <b>SET</b> | <b>MEDLINE</b>                                                                                                          |
|------------|-------------------------------------------------------------------------------------------------------------------------|
| 1          | Bipolar disorder                                                                                                        |
| 2          | BD                                                                                                                      |
| 3          | Bipolar                                                                                                                 |
| 4          | Manic depressive disorder                                                                                               |
| 5          | Manic depressive                                                                                                        |
| 6          | Manic                                                                                                                   |
| 7          | <i>Bipolar disorder</i>                                                                                                 |
| 8          | Sets 1-7 were combined with “OR”                                                                                        |
| 9          | Obsessive-compulsive disorder                                                                                           |
| 10         | Obsessive-compulsive                                                                                                    |
| 11         | OCD                                                                                                                     |
| 12         | <i>Obsessive-Compulsive Disorder</i>                                                                                    |
| 13         | Sets 9-12 were combined with “OR”                                                                                       |
| 14         | Sets 8 and 13 were combined with “AND”                                                                                  |
| 15         | Set 14 was limited to June 2015, Humans, English language, Child: 6-12 years, Adolescent: 13-18 years, Adult: 19+ years |

Words written in *italic* were used as MeSH headings, the others were used as free text.
